# Supplementary material
Source: MDPI journal article supplement (https://www.mdpi.com/2073-4344/12/9/1000)
Supplement: s1 [file s1]

Article

# Efficient and Eco-Friendly Perspectives for C-H Arylation of Benzothiazole Utilizing Pd Nanoparticle-Decorated Chitosan

Mohamed Mokhtar M. Mostafa <sup>1,\*</sup>, Tamer S. Saleh <sup>2</sup>, Salem M. Bawaked <sup>1</sup>, Khadijah S. Alghamdi <sup>3</sup>  
and Katabathini Narasimharao <sup>1,\*</sup>

<sup>1</sup> Chemistry Department, Faculty of Science, King Abdulaziz University, P.O. Box 80203, Jeddah 21589, Saudi Arabia

<sup>2</sup> Chemistry Department, Faculty of Science, University of Jeddah, P.O. Box 80329, Jeddah 21589, Saudi Arabia

<sup>3</sup> Chemistry Department, Faculty of Science, Al-Baha University, 7738-65779 Alaqiq, Albaha, Saudi Arabia

\* Correspondence: mmoustafa@kau.edu.sa (M.M.M.M.);  
nkatabathini@kau.edu.sa (K.N.)

## Supporting Information

### S1. Characterization of the catalyst

#### S1a. Powder XRD

#### S1b. DR UV-*vis*

#### S1c. H<sub>2</sub>-TPR of Pd@Chitosan sample

### S2. The physical and spectroscopic data of the synthesized compounds

### S3. NMR Charts of the synthesized compounds

## Characterization of the catalyst

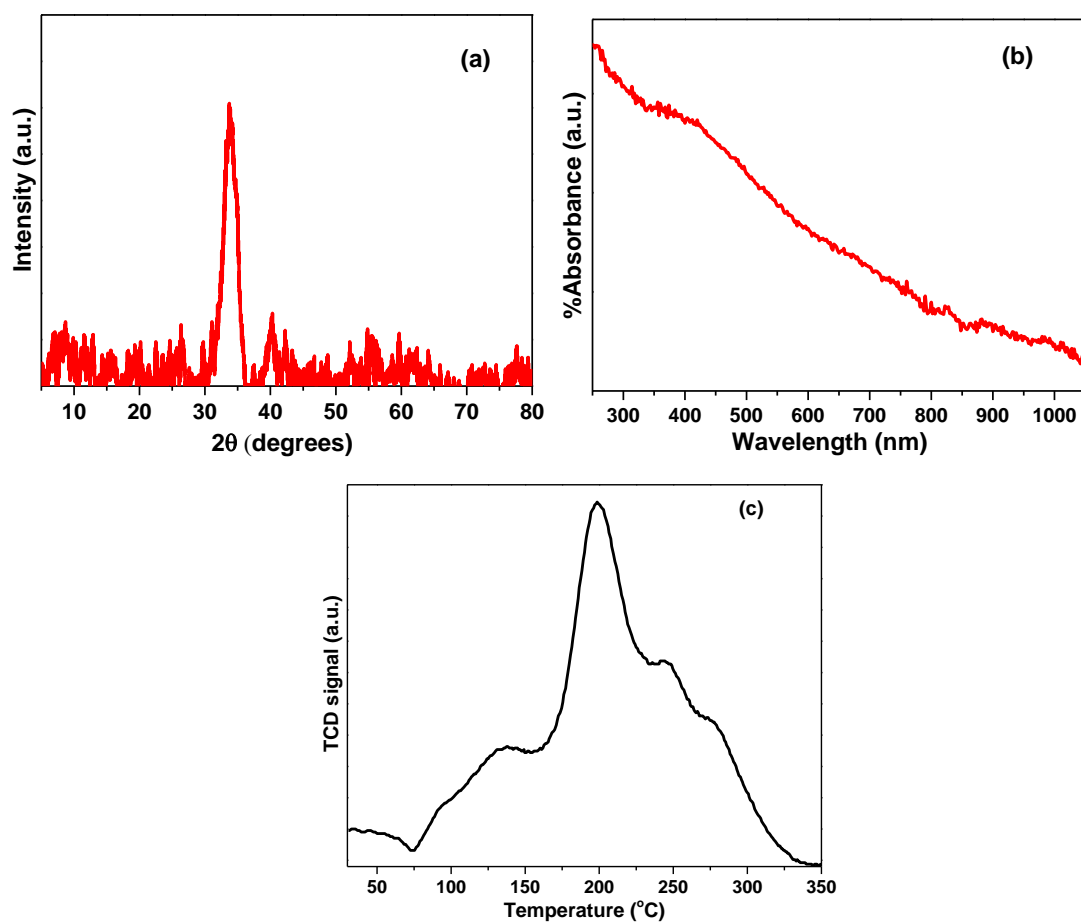

**Figure.S1.** (a) Powder XRD (b) DR UV-*vis* (c)  $H_2$ -TPR of 5%Pd@Chitosan sample

## ***S2: The physical and spectroscopic data of the synthesized compounds***

### ***1-(4-(Benzthiazol-2-yl)phenyl)ethan-1-one (3a)***

<sup>1</sup>H NMR (400 MHz, DMSO-*d*<sub>6</sub>) δ 2.54 (s, 3H, CH<sub>3</sub>), 7.16 (d, 2H, *J* = 7.6 Hz, ArH), 7.44-7.60 (m, 4H), 7.77 (d, 2H, *J* = 7.6 Hz, ArH). <sup>13</sup>C NMR (100 MHz, DMSO-*d*<sub>6</sub>) δ 26.8, 129.9, 128.7, 128.8, 129.4, 129.9, 133.9, 135.4, 137.8, 144.0, 149.0, 160.9, 193.0.

### ***2-Phenylbenzthiazole (3b)***

<sup>1</sup>H NMR (400 MHz, CDCl<sub>3</sub>) δ 7.35 (t, 1H, ArH), 7.46 (m, 4H, ArH), 7.88-8.10 (m, 4H, ArH). <sup>13</sup>C NMR (100 MHz, CDCl<sub>3</sub>) δ 121.6, 123.2, 125.2, 126.3, 127.5, 128.9, 130.9, 133.6, 135.1, 154.1, 168.0.

### ***2-(4-Methoxyphenyl)benzothiazole (3c)***

<sup>1</sup>H NMR (400 MHz, CDCl<sub>3</sub>) δ 3.88 (s, 3H, OCH<sub>3</sub>), 6.97-7.0 (m, 2H, ArH), 7.35 (d, 2H, *J* = 7.4 Hz, ArH), 7.36-7.48 (m, 2H, ArH), (8.02-8.04 (m, 2H, ArH), <sup>13</sup>C NMR (100 MHz, CDCl<sub>3</sub>) δ 55.5, 114.4, 121.5, 122.8, 124.8, 126.2, 126.4, 129.2, 134.8, 154.2, 161.9, 167.9.

### ***2-(4-Methylphenyl)benzothiazole (3d)***

m.p. 85-87 °C, <sup>1</sup>H NMR (CDCl<sub>3</sub>, 400 MHz) δ 2.42 (s, 3H, CH<sub>3</sub>), 6.85 (d, 2H, *J* = 8 Hz, ArH), 6.90-6.93 (m, 2H, ArH), 7.04 (d, 2H, *J* = 8 Hz, ArH), 7.14-7.41 (m, 2H, ArH). <sup>13</sup>C NMR (100 MHz, CDCl<sub>3</sub>) 21.1, 120.9, 124.0, 126.4, 128.7, 129.2, 129.4, 130.7, 136.7, 137.7, 151.2, 167.8. MS (*m/z*): 225 (M<sup>+</sup>). Anal. Calcd for C<sub>14</sub>H<sub>11</sub>NS: C, 74.63; H, 4.92; N, 6.22; S, 14.23. Found: C, 74.76; H, 4.87; N, 6.20; S, 14.17 %.

### ***Ethyl 4-(benzothiazol-2-yl)benzoate (3e)***

<sup>1</sup>H NMR (400 MHz, DMSO-*d*<sub>6</sub>) δ 0.96 (t, 3H, *J* = 7.00 Hz, CH<sub>3</sub> ester), 4.02 (q, 2H, *J* = 7.00 Hz, CH<sub>2</sub> ester), 7.36 (d, 2H, *J* = 7.2 Hz, ArH), 7.46-7.88 (m, 4H, ArH), 8.04 (d, 2H, *J* = 7.2 Hz, ArH). <sup>13</sup>C NMR (100 MHz, DMSO-*d*<sub>6</sub>) δ 13.9, 61.3, 119.9, 121.7,

122.8, 124.6, 127.5, 129.3, 130.9, 135.5, 144.9, 145.6, 154.9, 165.3, 169.4. MS (m/z): 283 (M<sup>+</sup>). Anal. Calcd for C<sub>16</sub>H<sub>13</sub>NO<sub>2</sub>S: C, 67.82; H, 4.62; N, 4.94; S, 11.31. Found: C, 67.98; H, 4.59; N, 4.89; S, 11.27 %.

### S3. NMR Charts of the synthesized compounds

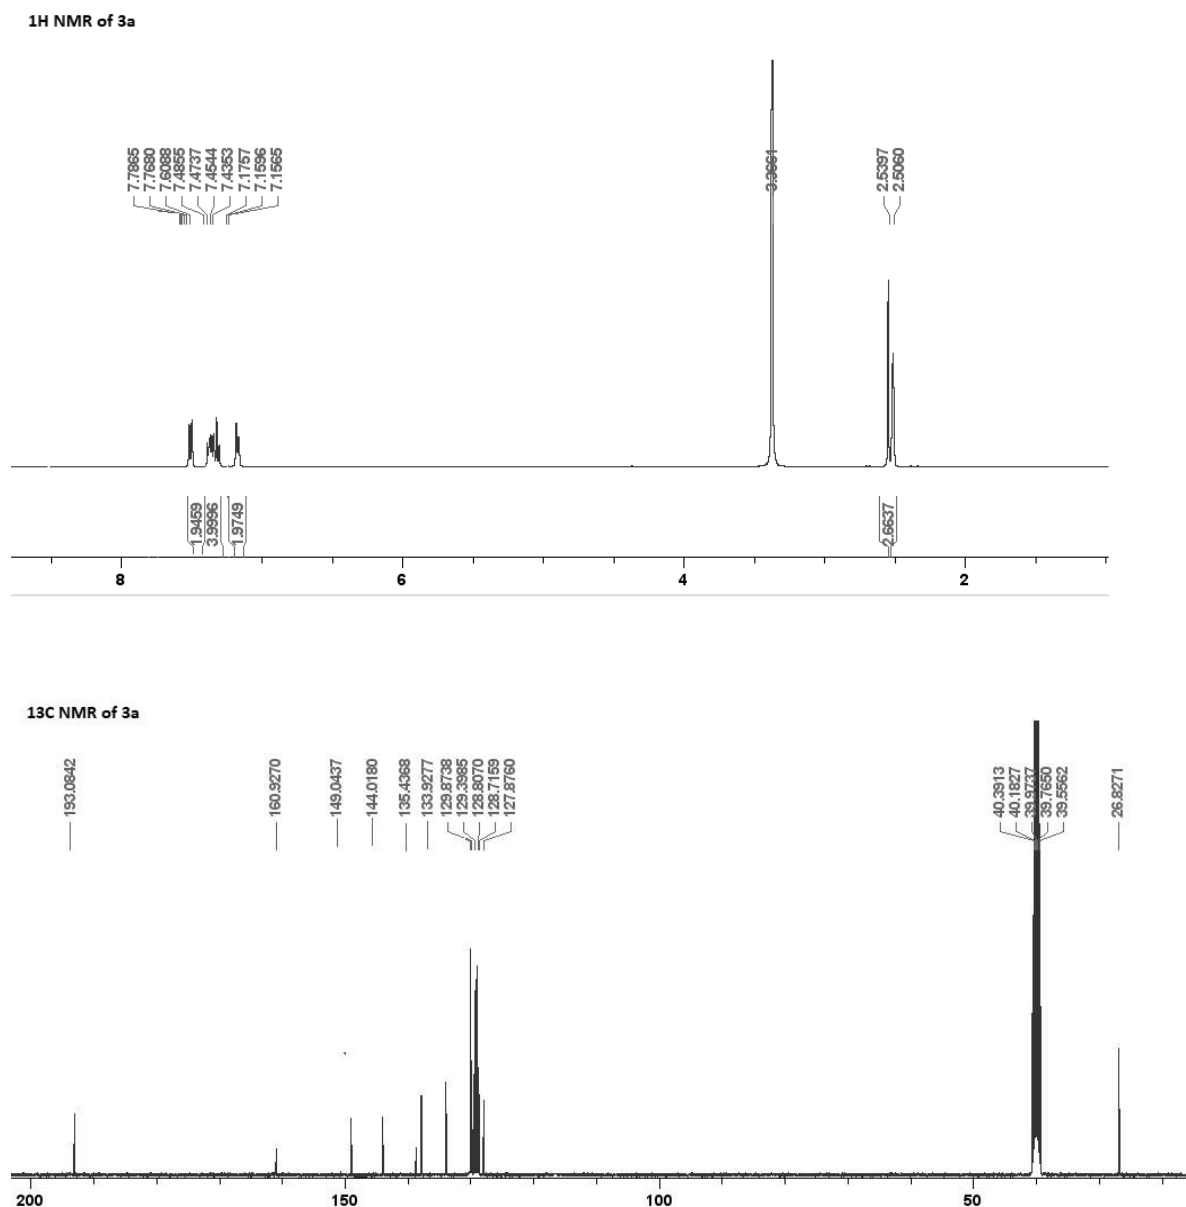

Figure S2. <sup>1</sup>H NMR and <sup>13</sup>C NMR of 1-(4-(Benzthiazol-2-yl)phenyl)ethan-1-one (3a)

# **<sup>1</sup>H NMR of 3b**

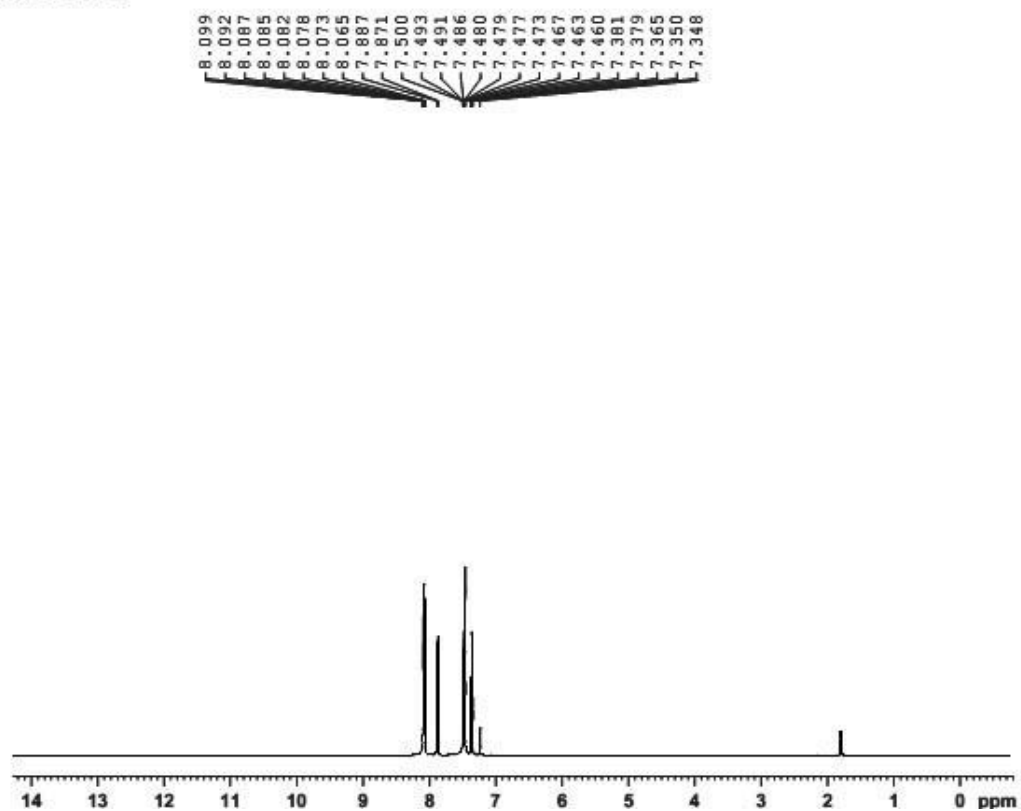

## **<sup>13</sup>C NMR of 3b**

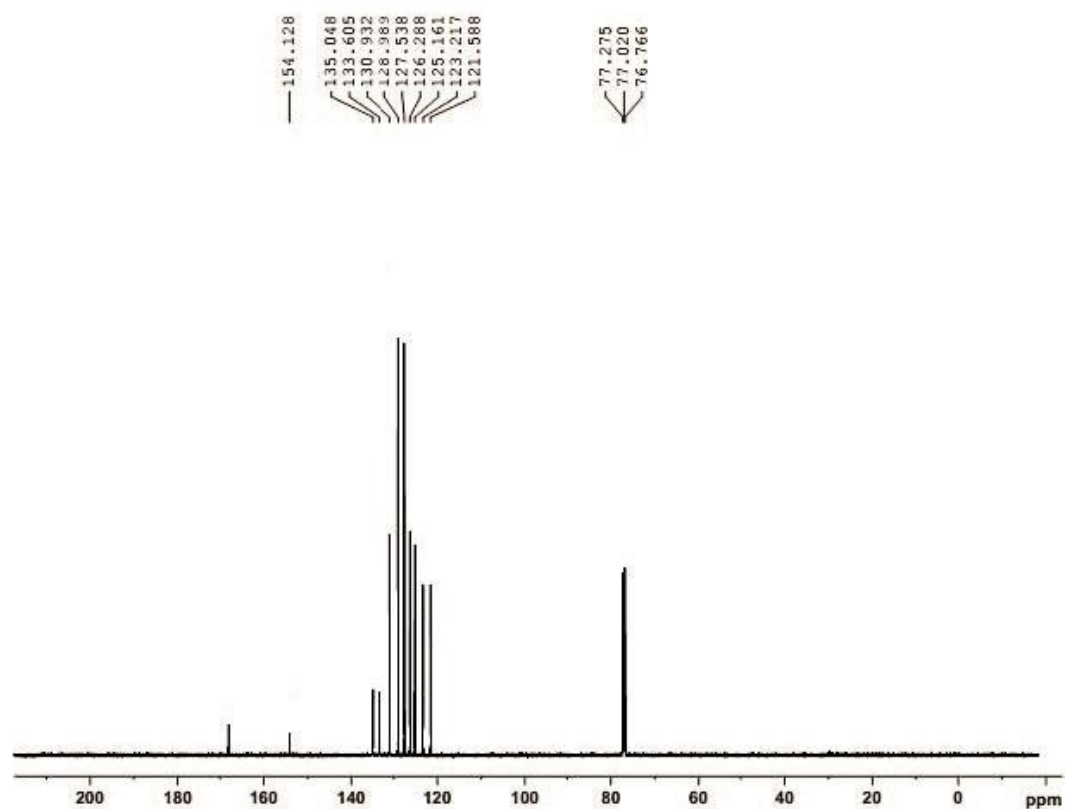

Figure S3.  $^1\text{H}$  NMR and  $^{13}\text{C}$  NMR of 2-Phenylbenzthiazole (3b)

**$^1\text{H}$  NMR of 3c**

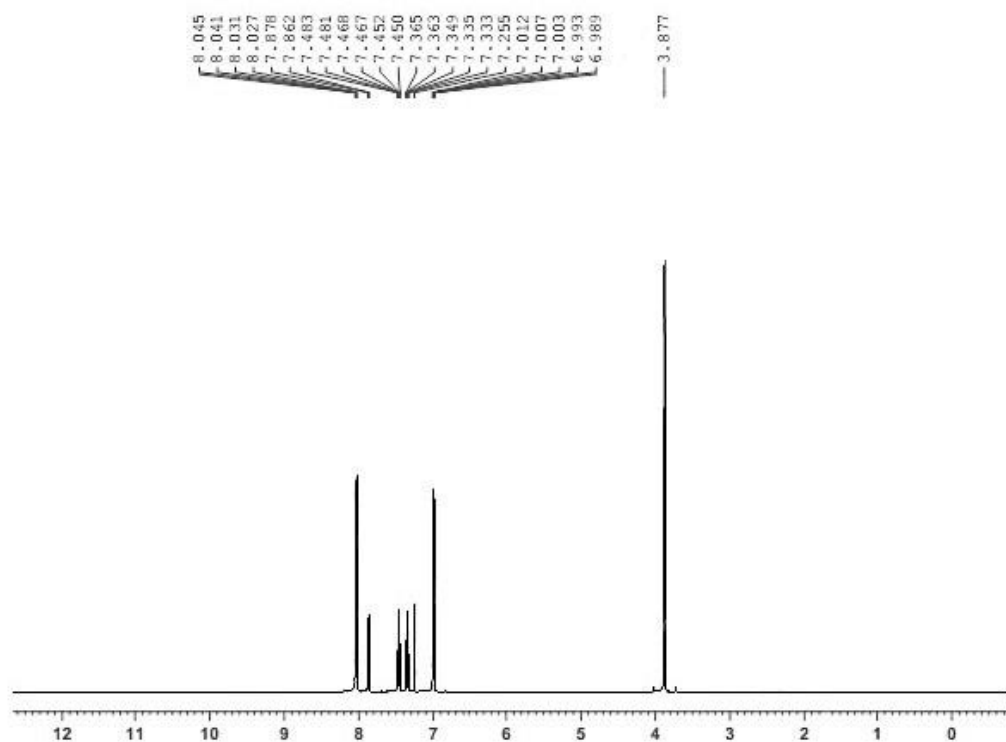

**<sup>13</sup>C NMR of 3c**

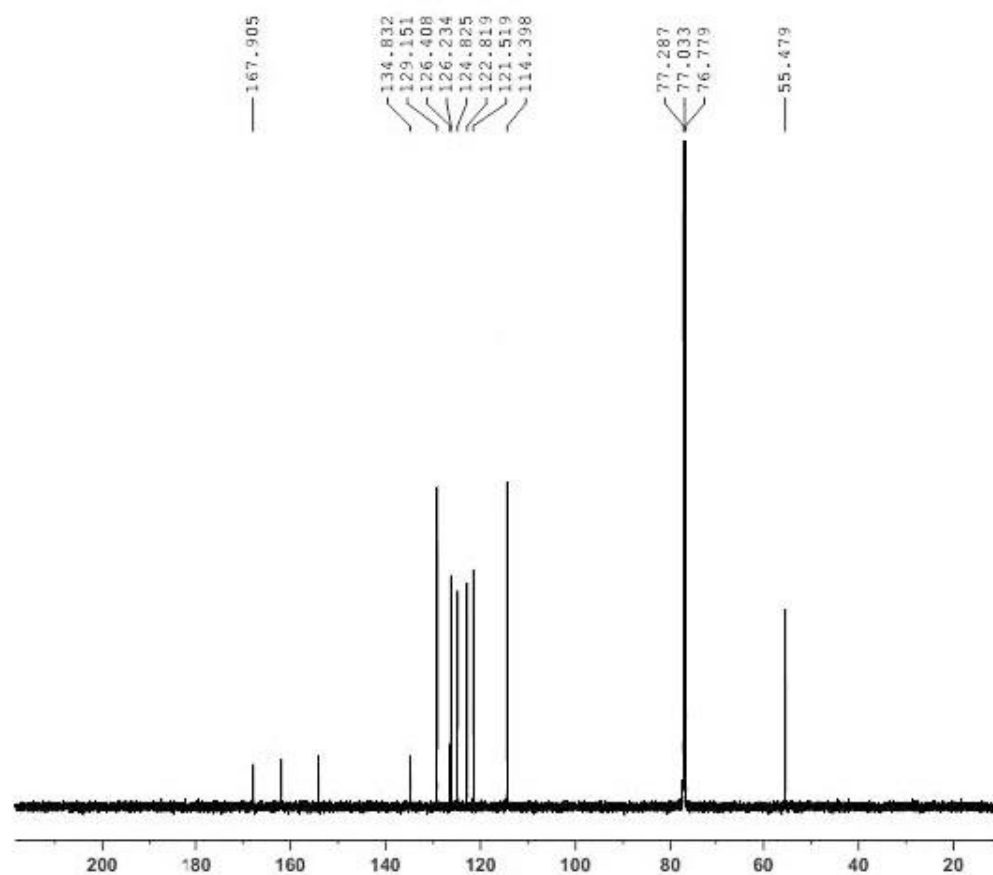

Figure S4. <sup>1</sup>H NMR and <sup>13</sup>C NMR of 2-(4-Methoxyphenyl)benzothiazole (3c)

**<sup>1</sup>H NMR of 3d**

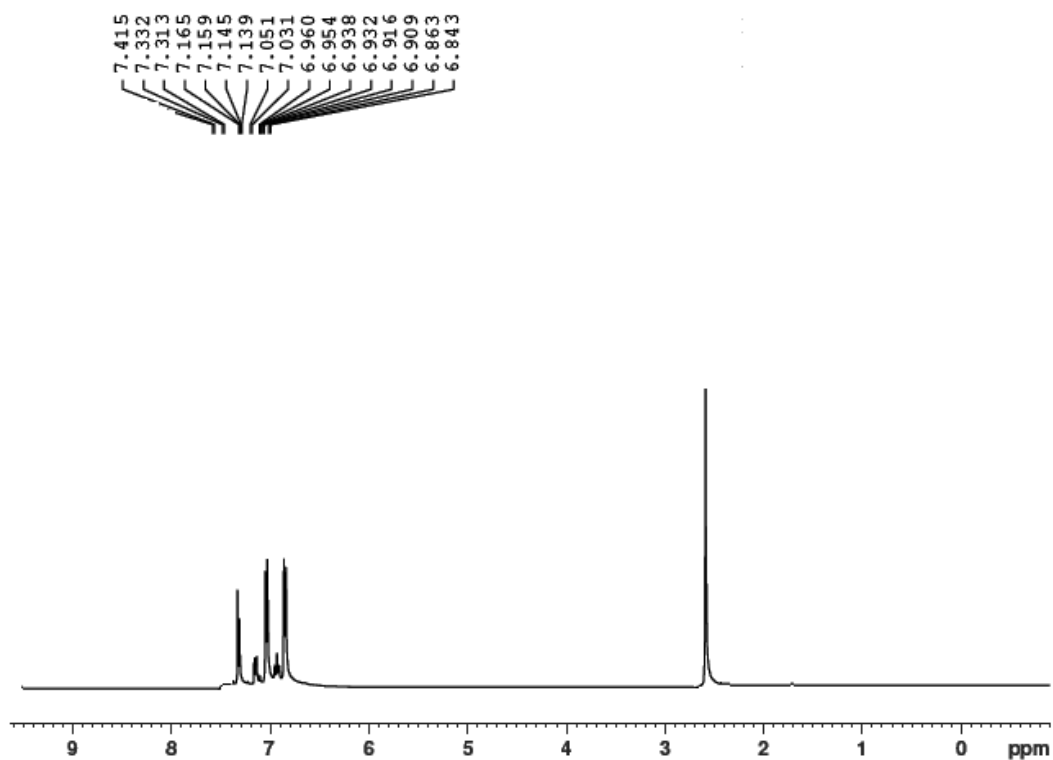

**<sup>13</sup>C NMR of 3d**

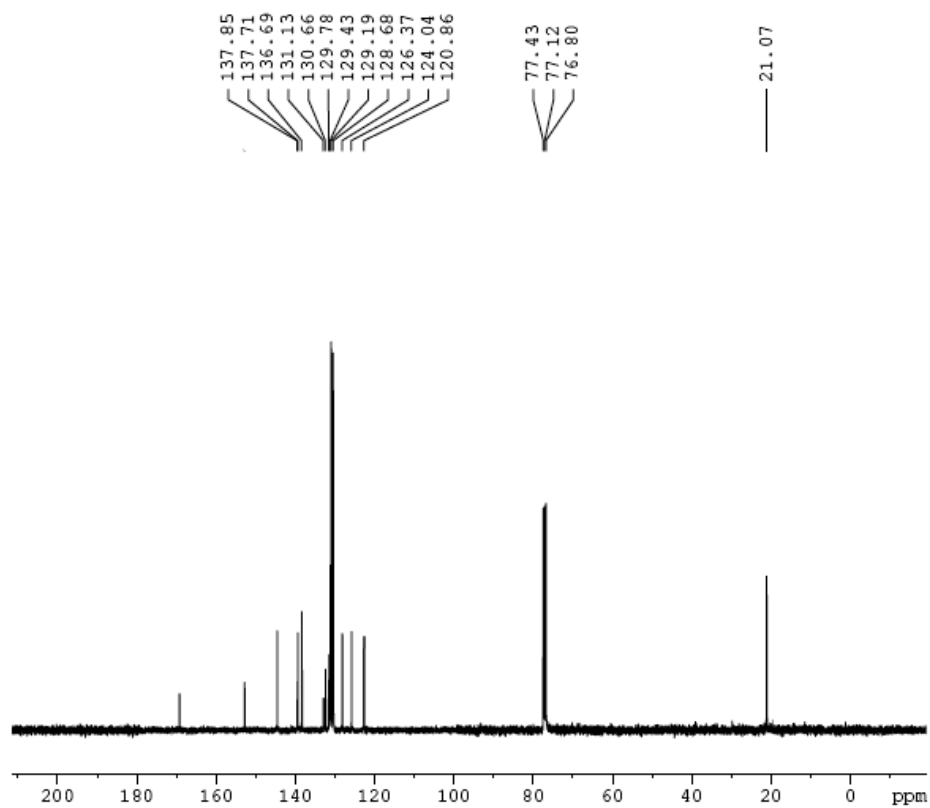

Figure S5. <sup>1</sup>H NMR and <sup>13</sup>C NMR of 2-(4-Methylphenyl)benzothiazole (3d)
